# Supplementary material for: Molecular Phenotypes Distinguish Patients with Relatively Stable from Progressive Idiopathic Pulmonary Fibrosis (IPF)
Source: PLoS One. 2009 Apr 6;4(4):e5134. doi: 10.1371/journal.pone.0005134 (PMC2661376; doi:10.1371/journal.pone.0005134)
Supplement: Table S2 — Genes over expressed in IPF when compared to normal lung. (0.07 MB XLS) [file pone.0005134.s004.xls]

## Sheet: 293 & mapping
ID	Tag_sequence	IPF	NLP	Log2_Ratio	Gene Symbol	Gene description
1	TCCCTATTAA	820	0	9.67948		Transcribed locus
2	CACTAATTGG	260	0	8.02237		Transcribed locus
3	CTGGGCCCCT	172	1	7.42626	FAM116B	Family with sequence similarity 116, member B
4	TAGTTGTCTA	172	0	7.42626		Transcribed locus
5	CTTTATTCCA	127	1	6.98868		Transcribed locus
6	AGAAGACGTT	121	0	6.91886		Transcribed locus
7	TCATACACTA	116	0	6.85798	POFUT1	Protein O-fucosyltransferase 1
8	CCCCGGCCAC	104	1	6.70044	DES	Desmin
9	CACATAATTG	99	0	6.62936		unknown
10	AGCCTACAAA	98	0	6.61471		internal tag
11	CAAATCCAAA	96	1	6.58496		internal tag
12	GAAATCCAAA	95	1	6.56986		unknown
13	TTCGGTTGGT	180	2	7.49185		unknown
14	TCATACACCT	84	0	6.39232		Transcribed locus
15	CTAGACTTCA	78	0	6.2854		unknown
16	AACCCTACAA	76	0	6.24793		unknown
17	CTGGGTGCCT	72	0	6.16993		unknown
18	TTTTCCAATT	142	2	7.14975		unknown
19	TAAGTGAACA	70	1	6.12928	COL15A1	Collagen, type XV, alpha 1
20	AAATACATAT	66	1	6.04439		unknown
21	CAGATAAGTT	64	1	6	COL14A1	Collagen, type XIV, alpha 1
22	CTCCCCCCAA	62	0	5.9542		unknown
23	TTAAGACTTC	58	1	5.85798		unknown
24	CTTCCTTGCC	114	2	6.83289	KRT42P	Keratin 17
25	ACTAACACCT	56	0	5.80735
26	GAGTGAGACC	54	1	5.75489	THY1	Thy-1 cell surface antigen
27	GTGAAACCTG	54	0	5.75489	ACPP	Acid phosphatase, prostate
28	GGATTTGGCT	53	1	5.72792	VAPB	VAMP (vesicle-associated membrane protein)-associated protein B and C (internal tag)
29	GCATAATAGT	53	0	5.72792
30	AGGCTCTGCA	52	1	5.70044	IGHV3-23	Immunoglobulin heavy constant mu
31	CTAAAACTTC	52	1	5.70044
32	AGCTGTCCCC	52	1	5.70044
33	GGCTGGGTTT	52	0	5.70044	HLX1	H2.0-like homeobox
34	GATCAGGCCA	99	2	6.62936	COL3A1	Collagen, type III, alpha 1 (Ehlers-Danlos syndrome type IV, autosomal dominant)
35	GTAGACACCT	48	1	5.58496	Hs.666222	Ribosomal protein L7 antisense mRNA, partial sequence
36	TGCCCTAAAA	46	1	5.52356	SORT1	Sortilin 1
37	TGAATAAAGT	46	1	5.52356	SLN	Sarcolipin
38	AGCACTCCAG	43	0	5.42626		unknown
39	TTTATGGGTT	42	1	5.39232	MGC5370	Hypothetical protein MGC5370
40	CACTTAATTG	80	2	6.32193		unknown
41	GGGAGGGGTG	40	1	5.32193		unknown
42	CACTGCACTC	40	0	5.32193	Hs.231850	Tubby homolog (mouse)
43	ATATAGTCAG	40	0	5.32193	CCND2	Cyclin D2
44	AATATTGAGA	78	2	6.2854	EIF3E	Eukaryotic translation initiation factor 3, subunit E
45	TGTAATCTTA	77	2	6.26679		Mitochondrial
46	AGTGACTGTG	76	2	6.24793	C7	Complement component 7
47	ATTTCTTCAA	77	2	6.26679	SFRP2	Secreted frizzled-related protein 2
48	GCCAACCTCC	77	2	6.26679	EP400NL	EP400 N-terminal like (shorter alternative transcript)
49	GTGTTCCCAT	38	1	5.24793	RNF146	Ring finger protein 146
50	CTGTACCTGG	38	0	5.24793	BMP4	Bone morphogenetic protein 4
51	GCCCAGCGGC	37	1	5.20945	STAP2	Signal transducing adaptor family member 2
52	GTCTTTCTGG	37	1	5.20945	UACA	Uveal autoantigen with coiled-coil domains and ankyrin repeats
53	TTTTGTAATT	37	1	5.20945	MBTPS1	Membrane-bound transcription factor peptidase, site 1
54	ATGTATGTGT	36	1	5.16993	ENAH	Enabled homolog (Drosophila)
55	GCCAAACTTG	36	1	5.16993	ARMCX3	Armadillo repeat containing, X-linked 3
56	TCAATAAAGG	36	1	5.16993	UBE2D3	Ubiquitin-conjugating enzyme E2D 3 (UBC4/5 homolog, yeast)
57	CACTCCAGCC	36	0	5.16993	UNQ6228	Hypothetical LOC100131541
58	AGCTCTCCTG	36	0	5.16993		unknown
59	GCACTGCACT	36	0	5.16993	HSDL2	Hydroxysteroid dehydrogenase like 2
60	CACAAAATCT	35	1	5.12928	TRIM2	Tripartite motif-containing 2
61	GAATTTGTGT	35	1	5.12928	SSR3	Signal sequence receptor, gamma (translocon-associated protein gamma)
62	TATTTTTCAA	35	1	5.12928	RSU1	Ras suppressor protein 1
63	TATGCGTTTG	70	2	6.12928	ZNF655	Zinc finger protein 655
64	AAGTGGATAG	68	2	6.08746	PNPLA4	Patatin-like phospholipase domain containing 4
65	GACTGAGCTT	34	1	5.08746	TARDBP	TAR DNA binding protein
66	TCAGATCTTG	34	1	5.08746	MED12L	Mediator complex subunit 12-like
67	TCACCGTGGA	34	1	5.08746	SELP	Selectin P (granule membrane protein 140kDa, antigen CD62)
68	AAAGAAAAAA	34	1	5.08746	LSS	Lanosterol synthase (2,3-oxidosqualene-lanosterol cyclase)
69	TACTGCTCGG	69	2	6.10852		Mitochondrial
70	TTGAATTCCC	67	2	6.06609	SEMA3C	Sema domain, immunoglobulin domain (Ig), short basic domain, secreted, (semaphorin) 3C
71	GACAGGCTGG	34	0	5.08746	COL18A1	Collagen, type XVIII, alpha 1
72	CTAACTTCGT	33	1	5.04439	ENAH	Enabled homolog (Drosophila)
73	TGCACGTTTC	33	1	5.04439		unknown
74	CCACTGCCCT	66	2	6.04439	C21orf88	Chromosome 21 open reading frame 88
75	ATTTTTGGTG	32	1	5	PREPL	Prolyl endopeptidase-like
76	TTTTGAAATA	32	1	5	TBC1D3	TBC1 domain family, member 3B
77	CTACTGAAAA	32	1	5	DDR2	Discoidin domain receptor tyrosine kinase 2
78	CCTTGTCCAG	32	1	5	GCN5L2	GCN5 general control of amino-acid synthesis 5-like 2 (yeast)
79	TTGGGATGGG	63	2	5.97728	CFH	Complement factor H
80	TCCTATGCAG	32	1	5	SORBS1	Sorbin and SH3 domain containing 1
81	AATTTTCATT	32	1	5	MSRB3	Methionine sulfoxide reductase B3
82	TCTTTGCAAA	32	1	5	TEAD1	TEA domain family member 1 (SV40 transcriptional enhancer factor)
83	GGCTCCTCGA	32	1	5	TAPBP	TAP binding protein (tapasin)
84	ACATAGACCG	32	1	5	SERPINF1	Serpin peptidase inhibitor, clade F (alpha-2 antiplasmin, pigment epithelium derived factor), member 1
85	GGGGTCAGGG	64	2	6		Mitochondrial
86	TCAGTGCGCA	31	1	4.9542	LOC114227	WD repeat domain 26
87	TTTGCACTTG	31	1	4.9542	WEE1	WEE1 homolog (S. pombe)
88	TGGGAAGTGG	31	1	4.9542	MEG3	Maternally expressed 3
89	CTTCGAAACT	31	1	4.9542	NDUFV2	NADH dehydrogenase (ubiquinone) flavoprotein 2, 24kDa
90	CTGAAAATTC	31	0	4.9542	MYSM1	Myb-like, SWIRM and MPN domains 1
91	TAGTTGTTTA	30	1	4.90689	DNAJC10	DnaJ (Hsp40) homolog, subfamily C, member 10
92	TTTCTAATTG	30	1	4.90689	PRPF4B	PRP4 pre-mRNA processing factor 4 homolog B (yeast)
93	TTTCTGTTTT	61	2	5.93074	WWC2	WW and C2 domain containing 2
94	TGTCTTTGTG	30	1	4.90689	Hs.432914	CDNA FLJ25106 fis, clone CBR01467
95	GCATAATAAG	30	1	4.90689	PATL2	CDNA FLJ27273 fis, clone TMS00761
96	TATTTTTACT	30	0	4.90689	ARHGEF12	Rho guanine nucleotide exchange factor (GEF) 12
97	TCCCAGAGAC	30	0	4.90689	B4GALT1	UDP-Gal:betaGlcNAc beta 1,4- galactosyltransferase, polypeptide 1
98	ATTTTGTATG	29	1	4.85798	NID1	Nidogen 1
99	CCCATTGTCC	29	1	4.85798		unknown
100	TAACTGTGTG	29	1	4.85798	SS18L2	Synovial sarcoma translocation gene on chromosome 18-like 2
101	GAAGTTGCCT	28	1	4.80735	ABLIM3	Actin binding LIM protein family, member 3
102	GTCATTTTCT	28	1	4.80735	ZEB1	Zinc finger E-box binding homeobox 1
103	GTATTTATCT	28	1	4.80735	CPSF6	Cleavage and polyadenylation specific factor 6, 68kDa
104	AAAAACCCTT	28	1	4.80735	TOPORS	Topoisomerase I binding, arginine/serine-rich
105	TTGTAAACTT	55	2	5.78136	FKBP3	FK506 binding protein 3, 25kDa
106	GATCTCATTT	28	1	4.80735	ITPR1	Inositol 1,4,5-triphosphate receptor, type 1
107	TTTCTGGAGG	28	1	4.80735	SIPA1L3	Signal-induced proliferation-associated 1 like 3
108	GTTCTAAATG	28	1	4.80735	NRBP2	Nuclear receptor binding protein 2
109	GTTAACTGGG	28	0	4.80735	ASCC3	Activating signal cointegrator 1 complex subunit 3
110	TTGTTAAGCC	27	1	4.75489	MRVI1	Murine retrovirus integration site 1 homolog
111	TGTCAAAAAA	27	0	4.75489	Hs.670392	CDNA clone IMAGE:5200165
112	AAACAATTAG	27	0	4.75489		unknown
113	AAAGCATTTT	52	2	5.70044	CAB39	Calcium binding protein 39
114	TGAATGATTT	53	2	5.72792	GBAS	Glioblastoma amplified sequence
115	TACCCCAGAA	52	2	5.70044	BCO2	Beta-carotene oxygenase 2
116	TAAAGATCCT	26	1	4.70044	PDCD4	Programmed cell death 4 (neoplastic transformation inhibitor)
117	ACTTTTTGGC	26	1	4.70044	TNRC6A	Trinucleotide repeat containing 6A
118	TTTGCTGAAC	26	0	4.70044	ABCC5	ATP-binding cassette, sub-family C (CFTR/MRP), member 5
119	AAACTAGTTG	26	0	4.70044	PPP1R12A	Protein phosphatase 1, regulatory (inhibitor) subunit 12A
120	TCATCTACAA	26	0	4.70044	ZNF468	Zinc finger protein 468
121	CTTTGCTGTG	50	2	5.64386	TRIP12	Thyroid hormone receptor interactor 12
122	TGATGATCAT	25	1	4.64386	EXOC1	Exocyst complex component 1
123	AAAGTGGAAA	25	1	4.64386	TAF7	TAF7 RNA polymerase II, TATA box binding protein (TBP)-associated factor, 55kDa
124	GAATTATACT	25	0	4.64386	TMEM45A	Transmembrane protein 45A
125	TTTTGGGTAT	25	0	4.64386	MAGED4	Melanoma antigen family D, 4
126	TTCCCCCAAG	25	0	4.64386		unknown
127	CCTGTCTGCA	25	0	4.64386	PRSS23	Protease, serine, 23
128	GTCTGCGTGC	25	0	4.64386	PSMA1	Proteasome (prosome, macropain) subunit, alpha type, 1
129	TACTTGTGTT	25	0	4.64386	BAZ1B	Bromodomain adjacent to zinc finger domain, 1B
130	GTCTTAAAGT	48	2	5.58496	SOD2	Superoxide dismutase 2, mitochondrial
131	GTAACAAGCT	24	1	4.58496	PJA2	Praja 2, RING-H2 motif containing
132	TAACCAAATA	24	1	4.58496		unknown
133	CAGATTTCTG	24	1	4.58496	PRPF4B	PRP4 pre-mRNA processing factor 4 homolog B (yeast)
134	ATACTCTTCT	24	1	4.58496	DOCK1	Dedicator of cytokinesis 1
135	AGCTGTTCTG	49	2	5.61471	HNRNPA1	Heterogeneous nuclear ribonucleoprotein A1
136	TCCTCCAAGG	48	2	5.58496	FAM21A	Family with sequence similarity 21, member A
137	TCATCATCTG	48	2	5.58496		unknown
138	TCCGGCCGCG	48	2	5.58496	CCDC72	Coiled-coil domain containing 72
139	AACCAGAGGT	24	1	4.58496	ANAPC7	Anaphase promoting complex subunit 7
140	TTGTGATACT	24	1	4.58496	HINT3	Histidine triad nucleotide binding protein 3
141	TAACTTTTGG	48	2	5.58496		unknown
142	TATGTATGTT	48	2	5.58496	CSNK1A1	Casein kinase 1, alpha 1
143	ACACAGTTTT	24	0	4.58496	FAT	FAT tumor suppressor homolog 1 (Drosophila)
144	CTTCTATGTA	24	0	4.58496	PARP4	Poly (ADP-ribose) polymerase family, member 4
145	GCTGTTCCCC	24	0	4.58496	SNAPC4	Small nuclear RNA activating complex, polypeptide 4, 190kDa
146	AAACTCGAGC	24	0	4.58496	TNPO2	Transportin 2 (importin 3, karyopherin beta 2b)
147	AGACAAGTTT	24	0	4.58496	HSPA4	Heat shock 70kDa protein 4
148	ATATGGATTT	23	1	4.52356	LOC100133849	CLPTM1-like
149	TTGGTGAAAG	46	2	5.52356		unknown
150	GCACGGAAAA	23	1	4.52356		unknown
151	ACTCTTTAGG	23	0	4.52356	BCLAF1	BCL2-associated transcription factor 1
152	CTTTCTTAAT	23	0	4.52356	FOXJ2	Forkhead box J2
153	GTGGAACCCC	23	0	4.52356	LRBA	LPS-responsive vesicle trafficking, beach and anchor containing
154	CCCAGGACAC	23	0	4.52356	VWA1	Von Willebrand factor A domain containing 1
155	TGAAAGTGTG	44	2	5.45943	HSPH1	Heat shock 105kDa/110kDa protein 1
156	ATTTGAATAA	22	1	4.45943	KRIT1	KRIT1, ankyrin repeat containing
157	AGTGTAATGG	22	1	4.45943	AASDHPPT	Aminoadipate-semialdehyde dehydrogenase-phosphopantetheinyl transferase
158	GGAGAGTACA	22	1	4.45943	ST3GAL5	ST3 beta-galactoside alpha-2,3-sialyltransferase 5
159	GTTCTCCCAC	44	2	5.45943	SEC61A1	Sec61 alpha 1 subunit (S. cerevisiae)
160	TGAGTGAATT	44	2	5.45943	CGNL1	Cingulin-like 1
161	TGGGAGCTTT	22	1	4.45943	CHMP2B	Chromatin modifying protein 2B
162	GATAGCACAG	44	2	5.45943	IGFBP5	Insulin-like growth factor binding protein 5
163	CCTTGGTTTT	22	0	4.45943	TMEM189-UBE2V1	Ubiquitin-conjugating enzyme E2 variant 1
164	CTTCTCTCTC	22	0	4.45943		unknown
165	ATGGCCAACT	42	2	5.39232	TCF25	Transcription factor 25 (basic helix-loop-helix)
166	TTGTATTCCA	42	2	5.39232	IGBP1	Immunoglobulin (CD79A) binding protein 1
167	GGCTGCCCTG	42	2	5.39232	DPYSL3	Dihydropyrimidinase-like 3
168	TTTGTATAGA	42	2	5.39232	HERC2P2	Hect domain and RLD 2 pseudogene
169	GAGGATTTTA	21	1	4.39232	RCN2	Reticulocalbin 2, EF-hand calcium binding domain
170	TGTTCAGTTG	21	1	4.39232	TMEM181	Transmembrane protein 181
171	TTCTAGAACT	42	2	5.39232	IGJ	Immunoglobulin J polypeptide, linker protein for immunoglobulin alpha and mu polypeptides
172	TGAAAATCAA	21	0	4.39232	TIA1	TIA1 cytotoxic granule-associated RNA binding protein
173	TTTTCCCACC	21	0	4.39232	TNK2	Tyrosine kinase, non-receptor, 2
174	GGTGGGTTTA	21	0	4.39232		unknown
175	GAGAGTGTCT	40	2	5.32193	TIMP1	TIMP metallopeptidase inhibitor 1
176	CCTCTGGAGG	41	2	5.35755	POR	P450 (cytochrome) oxidoreductase
177	AAATAAAAAA	40	2	5.32193	ESAM	Endothelial cell adhesion molecule
178	AACTGCGGCA	40	2	5.32193	CIP29	Cytokine induced protein 29 kDa
179	TCTTTTATTA	39	2	5.2854	LOC388720	Similar to ubiquitin
180	TCTGACAAAC	41	2	5.35755	TMSB4X	Thymosin beta 4, X-linked
181	ATTGATGACG	20	1	4.32193	TTC1	Tetratricopeptide repeat domain 1
182	GTGGCTCACT	20	1	4.32193	TRSPAP1	TRNA selenocysteine associated protein 1
183	TTTTGTAAAT	41	2	5.35755	MARCKS	Myristoylated alanine-rich protein kinase C substrate
184	ATATTCTGCC	20	1	4.32193	TXNDC10	Thioredoxin domain containing 10
185	ATGATTTATT	40	2	5.32193	TTC35	Tetratricopeptide repeat domain 35
186	ATCACGCCAC	41	2	5.35755	Hs.605719	CDNA clone IMAGE:3927515
187	AGTAAAAAAA	39	2	5.2854		unknown
188	TAATTTGAAA	20	1	4.32193	EGLN1	Egl nine homolog 1 (C. elegans)
189	GTGCTAAGCG	40	2	5.32193	COL6A2	Collagen, type VI, alpha 2
190	TTGTATTGTT	20	0	4.32193	Hs.98445	CDNA: FLJ21652 fis, clone COL08582
191	TTATTTAATA	20	0	4.32193	C1orf67	Chromosome 1 open reading frame 67
192	CACAAAATAA	20	0	4.32193	Hs.709775	MRNA; cDNA DKFZp686I10116 (from clone DKFZp686I10116)
193	TTTCAAATAA	38	2	5.24793	TACC2	Transforming, acidic coiled-coil containing protein 2
194	TAAGCTGTGC	38	2	5.24793	CYBRD1	Cytochrome b reductase 1
195	GTGGTGGACA	38	2	5.24793	RSL1D1	Ribosomal L1 domain containing 1
196	TAACCAAACA	38	2	5.24793	C19orf29	Chromosome 19 open reading frame 29
197	TCCCCACACC	19	0	4.24793	ILK	TAF10 RNA polymerase II, TATA box binding protein (TBP)-associated factor, 30kDa
198	GATCAAAACT	19	0	4.24793	C21orf7	Chromosome 21 open reading frame 7
199	GAGTGCAGGT	37	2	5.20945	TROVE2	TROVE domain family, member 2
200	TAAACCTAGG	35	2	5.12928	MEGF6	Multiple EGF-like-domains 6
201	GTTTTAGTGA	36	2	5.16993	HNRNPA3	Heterogeneous nuclear ribonucleoprotein A3
202	AAGGGGCCTT	36	2	5.16993	COL16A1	Collagen, type XVI, alpha 1
203	AACATAAATT	18	1	4.16993	CPXCR1	CPX chromosome region, candidate 1
204	TGTTAGATTT	35	2	5.12928	CBX1	Chromobox homolog 1 (HP1 beta homolog Drosophila )
205	GAGTGACTAT	37	2	5.20945	FOXP1	Forkhead box P1
206	TGCTGCCTCA	37	2	5.20945	HOOK2	Hook homolog 2 (Drosophila)
207	ATCCTACTGT	18	1	4.16993	ECHDC1	Enoyl Coenzyme A hydratase domain containing 1
208	CATAGATTTT	36	2	5.16993	AHR	Aryl hydrocarbon receptor
209	TGCAAAAAAA	37	2	5.20945	SLC1A6	Solute carrier family 1 (high affinity aspartate/glutamate transporter), member 6
210	TCCCCTCTCT	18	0	4.16993	ANAPC5	Anaphase promoting complex subunit 5
211	CGTGTAATCC	18	0	4.16993	PDCD4	Programmed cell death 4 (neoplastic transformation inhibitor) (internally primed site)
212	ACTACAGCCA	17	1	4.08746	CD96	CD96 molecule
213	GAGCCAAAGA	34	2	5.08746	COLEC12	Collectin sub-family member 12
214	GTGTGGTTAA	34	2	5.08746		unknown
215	TAAATCTGAA	34	2	5.08746		unknown
216	GGTTGATTCT	34	2	5.08746	PDE4D	Phosphodiesterase 4D, cAMP-specific (phosphodiesterase E3 dunce homolog, Drosophila)
217	GTGGCGCACA	34	2	5.08746	OSGEP	O-sialoglycoprotein endopeptidase
218	TATGTTGTCT	34	2	5.08746	Hs.631870	CDNA clone IMAGE:4994693 (internally primed)
219	TGGTGATTTT	17	0	4.08746	FBXO40	F-box protein 40
220	CTGTAATCCC	17	0	4.08746	ECHDC2	Enoyl Coenzyme A hydratase domain containing 2
221	CTGCTAAGGT	33	2	5.04439	KIAA0746	KIAA0746 protein
222	TCCACTACCA	31	2	4.9542	CCDC53	Coiled-coil domain containing 53
223	TCTATAGAGT	32	2	5	ARPP-19	Cyclic AMP phosphoprotein, 19 kD
224	ACCCAATTTG	31	2	4.9542	PAN3	PAN3 polyA specific ribonuclease subunit homolog (S. cerevisiae)
225	ACTGCTTTAC	32	2	5	MXRA5	Matrix-remodelling associated 5
226	CCCTAGGTTG	33	2	5.04439	PLXNB2	Plexin B2
227	GCCTTTCCCT	31	2	4.9542	USP22	Ubiquitin specific peptidase 22
228	GCCGCCCTGC	32	2	5	ACADVL	Acyl-Coenzyme A dehydrogenase, very long chain
229	TGAATCTGGG	32	2	5	SET	SET nuclear oncogene
230	GATAGGAATA	32	2	5	SSBP2	Single-stranded DNA binding protein 2
231	TTTGTAGATG	30	2	4.90689	HSPA9	Heat shock 70kDa protein 9 (mortalin)
232	CTCTGTAATT	30	2	4.90689	RAB11A	RAB11A, member RAS oncogene family
233	CCGAAGTCGA	30	2	4.90689	SMURF2	SMAD specific E3 ubiquitin protein ligase 2
234	AATGGATTCC	30	2	4.90689	PHF17	PHD finger protein 17
235	ACATCCCAGA	30	2	4.90689	CORO1C	Coronin, actin binding protein, 1C
236	GGGGAGGGGG	30	2	4.90689	UBTF	Upstream binding transcription factor, RNA polymerase I
237	TAGGTCACAG	15	1	3.90689	PLEKHO2	Pleckstrin homology domain containing, family O member 2
238	ATCATACCAC	30	2	4.90689	ALKBH4	AlkB, alkylation repair homolog 4 (E. coli)
239	CAGATGGTAG	30	2	4.90689		unknown
240	ACAAGATTTT	15	0	3.90689		unknown
241	CCTGTAGTAT	27	2	4.75489		unknown
242	CCTCTGCACT	29	2	4.85798		unknown
243	AAGTGGGTGC	28	2	4.80735	CIRBP	Cold inducible RNA binding protein
244	AAATAAAAGG	27	2	4.75489	CBWD2	COBW domain containing 2
245	CCACTTCACT	29	2	4.85798	Hs.151220	Palladin, cytoskeletal associated protein
246	ACGATGGCCG	28	2	4.80735	GMFG	Glia maturation factor, gamma
247	ATACAGATTG	27	2	4.75489	ANAPC10	Anaphase promoting complex subunit 10
248	ATATGGAATA	28	2	4.80735	PFTK1	PFTAIRE protein kinase 1
249	GCCCCTGCGC	28	2	4.80735	NRN1L	Neuritin 1-like
250	GATTAGAGGT	28	2	4.80735	SETX	Senataxin
251	TCAAACTGCT	29	2	4.85798		unknown
252	GAAATGAGCA	29	2	4.85798	SPATA7	Spermatogenesis associated 7
253	GCCAAGATGC	28	2	4.80735	GADD45GIP1	Growth arrest and DNA-damage-inducible, gamma interacting protein 1
254	TCACCTGTAG	28	2	4.80735	AKAP1	A kinase (PRKA) anchor protein 1
255	TTACCATTGG	27	2	4.75489	ZRANB2	Zinc finger, RAN-binding domain containing 2
256	GCCCCCCCGT	29	2	4.85798	PSMG3	Proteasome (prosome, macropain) assembly chaperone 3
257	CTCTGAGAGA	26	2	4.70044	MTIF3	Mitochondrial translational initiation factor 3
258	GCTCATTAAA	26	2	4.70044	Hs.513000	CDNA clone IMAGE:5299888
259	TGTCTTTAAA	26	2	4.70044	XKR9	XK, Kell blood group complex subunit-related family, member 9
260	GATGGCTGCC	26	2	4.70044	SLC39A9	Solute carrier family 39 (zinc transporter), member 9
261	TAGAGAATGA	26	2	4.70044		unknown
262	ACTGTGCCAC	26	2	4.70044	DCLRE1C	DNA cross-link repair 1C (PSO2 homolog, S. cerevisiae)
263	GTTTTAATTT	26	2	4.70044		Muscleblind-like (Drosophila)
264	ATTTCACATT	26	2	4.70044	PHLDB2	Pleckstrin homology-like domain, family B, member 2
265	CCACAGCACT	26	2	4.70044	NUDT4	Nudix (nucleoside diphosphate linked moiety X)-type motif 4 pseudogene 2
266	CAGGCCTGGC	24	2	4.58496	TMEM134	Transmembrane protein 134
267	CCCAAGGTCT	24	2	4.58496	AFTPH	Aftiphilin
268	CAGCCTTGGA	24	2	4.58496	RBM8A	RNA binding motif protein 8A
269	TGGACCCAAC	23	2	4.52356	SLC30A9	Solute carrier family 30 (zinc transporter), member 9
270	AAATGTGTAA	24	2	4.58496	C14orf119	Chromosome 14 open reading frame 119
271	AAGGAGTTAC	25	2	4.64386		unknown
272	AAGGATGCGG	25	2	4.64386	TAF11	TAF11 RNA polymerase II, TATA box binding protein (TBP)-associated factor, 28kDa
273	TGTGTACTTA	25	2	4.64386	TXNDC15	Thioredoxin domain containing 15
274	GAGGGGAAAC	25	2	4.64386	SHC1	SHC (Src homology 2 domain containing) transforming protein 1
275	AATTCTGTAA	23	2	4.52356	GNPTG	N-acetylglucosamine-1-phosphate transferase, gamma subunit
276	GGTACAAATA	24	2	4.58496	GBA2	Glucosidase, beta (bile acid) 2
277	TCTTTCTTGA	24	2	4.58496	KLHL2	Kelch-like 2, Mayven (Drosophila)
278	ACGTGGTGAT	23	2	4.52356	C19orf53	Chromosome 19 open reading frame 53
279	TCTGCCTGGG	24	2	4.58496	TRAPPC1	Trafficking protein particle complex 1
280	AGATGTGTGG	25	2	4.64386	HADHB	Hydroxyacyl-Coenzyme A dehydrogenase/3-ketoacyl-Coenzyme A thiolase/enoyl-Coenzyme A hydratase (trifunctional protein), beta subunit
281	AGCTGGGTTG	25	2	4.64386	RNF121	Ring finger protein 121
282	CTCTCAATGG	24	2	4.58496	DPAGT1	Dolichyl-phosphate (UDP-N-acetylglucosamine) N-acetylglucosaminephosphotransferase 1 (GlcNAc-1-P transferase)
283	ATATAGGTCG	22	2	4.45943	XRCC5	X-ray repair complementing defective repair in Chinese hamster cells 5 (double-strand-break rejoining; Ku autoantigen, 80kDa)
284	GTGGCGCACG	22	2	4.45943	GLTP	Glycolipid transfer protein
285	GTAGAGCTTG	22	2	4.45943	PARP6	Poly (ADP-ribose) polymerase family, member 6
286	GGAGCACTGT	22	2	4.45943	TRIM25	Tripartite motif-containing 25
287	CAGCTCTTAG	22	2	4.45943	EDC3	Enhancer of mRNA decapping 3 homolog (S. cerevisiae)
288	GTGAGACCTT	21	2	4.39232	METTL8	Methyltransferase like 8
289	CTTTTGTTCT	20	2	4.32193	STX12	Syntaxin 12
290	TCTGTTTACT	20	2	4.32193	MTHFD1	Methylenetetrahydrofolate dehydrogenase (NADP+ dependent) 1, methenyltetrahydrofolate cyclohydrolase, formyltetrahydrofolate synthetase
291	AAAGCAATCA	20	2	4.32193	PHC1	Polyhomeotic homolog 1 (Drosophila)
292	AAATTAAAAA	19	2	4.24793	WDR70	WD repeat domain 70
293	TTGATGCCCT	20	2	4.32193	KIAA1310	KIAA1310
