# Supplementary material for: Molecular Phenotypes Distinguish Patients with Relatively Stable from Progressive Idiopathic Pulmonary Fibrosis (IPF)
Source: PLoS One. 2009 Apr 6;4(4):e5134. doi: 10.1371/journal.pone.0005134 (PMC2661376; doi:10.1371/journal.pone.0005134)
Supplement: Table S4 — Candidate IPF biomarkers. (0.02 MB XLS) [file pone.0005134.s006.xls]

## Sheet: IPF Biomarkers
Gene Symbol	Gene Description	Location	Log 2Ratio	Blood	Bronchoalveolar Lavage Fluid	Plasma Serum	Sputum	Lung
AHR	aryl hydrocarbon receptor	Nucleus	4.17	x				x
AKAP1	A kinase (PRKA) anchor protein 1	Cytoplasm	3.807	x				x
ARHGEF12	Rho guanine nucleotide exchange factor (GEF) 12	Cytoplasm	4.907	x		x		x
B4GALT1	UDP-Gal:betaGlcNAc beta 1,4- galactosyltransferase, polypeptide 1	Cytoplasm	4.907	x	x			x
CFH	complement factor H	Extracellular Space	5	x	x	x	x	x
COL3A1	collagen, type III, alpha 1 (Ehlers-Danlos syndrome type IV, autosomal dominant)	Extracellular Space	5.644	x		x		x
CSNK1A1	casein kinase 1, alpha 1	Cytoplasm	4.585	x		x		x
DDR2	discoidin domain receptor family, member 2	Plasma Membrane	5	x				x
DOCK1	dedicator of cytokinesis 1	Cytoplasm	4.585	x		x		x
FOXP1	forkhead box P1	Nucleus	4.17	x				x
HNRNPA1	heterogeneous nuclear ribonucleoprotein A1	Nucleus	4.585	x				x
IGBP1	immunoglobulin (CD79A) binding protein 1	Cytoplasm	4.392	x		x		x
IGFBP5	insulin-like growth factor binding protein 5	Extracellular Space	4.459	x		x		x
ILK	integrin-linked kinase	Plasma Membrane	4.248	x				x
ITPR1	inositol 1,4,5-triphosphate receptor, type 1	Cytoplasm	4.807	x		x		x
PALLD	palladin, cytoskeletal associated protein	Cytoplasm	3.807	x				x
PDE4D	phosphodiesterase 4D, cAMP-specific (phosphodiesterase E3 dunce homolog, Drosophila)	Cytoplasm	4.087	x				x
PLXNB2	plexin B2	Plasma Membrane	4	x		x		x
RSU1	Ras suppressor protein 1	Cytoplasm	5.129		x			x
SEMA3C	sema domain, immunoglobulin domain (Ig), short basic domain, secreted, (semaphorin) 3C	Extracellular Space	5.087	x		x		x
SET	SET translocation (myeloid leukemia-associated)	Nucleus	4	x				x
SETX	senataxin	Nucleus	3.807	x		x		x
SHC1	SHC (Src homology 2 domain containing) transforming protein 1	Cytoplasm	3.585	x				x
SOD2	superoxide dismutase 2, mitochondrial	Cytoplasm	4.585	x	x	x		x
SORT1	sortilin 1	Cytoplasm	5.524	x		x		x
TIMP1	TIMP metallopeptidase inhibitor 1	Extracellular Space	4.322	x	x	x	x	x
TMSB4X	thymosin, beta 4, X-linked	Cytoplasm	4.322	x				x
TNK2	tyrosine kinase, non-receptor, 2	Cytoplasm	4.392	x		x		x
UBTF	upstream binding transcription factor, RNA polymerase I	Nucleus	3.907	x		x		x
WEE1	WEE1 homolog (S. pombe)	Nucleus	4.954	x		x		x
XRCC5	X-ray repair complementing defective repair in Chinese hamster cells 5 (double-strand-break rejoining; Ku autoantigen, 80kDa)	Nucleus	3.459	x				x
ZEB1	zinc finger E-box binding homeobox 1	Nucleus	4.807	x				x
